# Supplementary material for: Cross Dimerization of Amyloid-β and αSynuclein Proteins in Aqueous Environment: A Molecular Dynamics Simulations Study
Source: PubMed Central journal article supplement (PMC4161357; doi:10.1371/journal.pone.0106883), 2014-09-11
Supplement: pone.0106883.s001.pdf [file pone.0106883.s001.pdf]

**Supporting Information to**  
**“Cross Dimerization of Amyloid- $\beta$  and  $\alpha$ Synuclein Proteins in Aqueous Environment: a Molecular Dynamics Simulations Study”**

*Jaya C. Jose,<sup>†</sup> Prathit Chatterjee<sup>†</sup> and Neelanjana Sengupta<sup>†\*</sup>*

*<sup>†</sup>Physical Chemistry Division*

*CSIR-National Chemical Laboratory,*

*Pune, Maharashtra,*

*India*

\* Corresponding author: *E-mail address:* [n.sengupta@ncl.res.in](mailto:n.sengupta@ncl.res.in)

Phone: +91-20-25902087

Fax: +91-20-25902636

**Table S1.** Salt bridge distances

| Cluster | Salt Bridge | $d^{\text{SB}}$ |
|---------|-------------|-----------------|
| C1      | K6 – D7     | 9.1 (2.9)       |
|         | K21 – E11   | 4.5 (2.7)       |
|         | E28 – R5    | 3.6 (0.5)       |
| C2      | K6 – D1     | 7.4 (4.3)       |
|         | K32 – D1    | 5.5 (3.4)       |
|         | K32 – E3    | 5.9 (1.9)       |
|         | K80 – D7    | 2.9 (0.2)       |
|         | K80 – E3    | 3.3 (0.3)       |
| C3      | K6 – E3     | 5.9 (2.4)       |
|         | K12 – E22   | 5.7 (3.2)       |
| C5      | K6 – E22    | 4.0 (1.3)       |
|         | K6 – D23    | 5.6 (2.2)       |
|         | K10 – D23   | 2.9 (0.3)       |
|         | K12 – D1    | 3.5 (0.6)       |
|         | E83 – K28   | 8.5 (3.4)       |

Mean value of the inter-residue sidechain distances ( $d^{\text{SB}}$ , in Å) between the residues that form salt bridges in the clusters a) C1, b) C2, c) C3, d) C5. Standard deviations are provided in braces. The first residue belongs to  $\alpha\text{Syn}_{1-95}$ ; the second residue belongs to  $A\beta_{1-42}$ .

**Table S2.** Details of internal contacts and compactness of peptides in different clusters

| Clusters | $\langle N_{\text{int}}^{\text{A}\beta} \rangle$ | $\langle N_{\text{int}}^{\alpha\text{S}} \rangle$ | $R_g^{\text{A}\beta}$ | $R_g^{\alpha\text{S}}$ |
|----------|--------------------------------------------------|---------------------------------------------------|-----------------------|------------------------|
| C1       | 141.4<br>(7.4)                                   | 485.0<br>(18.0)                                   | 12.0<br>(0.5)         | 14.6<br>(0.2)          |
| C2       | 141.5<br>(9.1)                                   | 414.6<br>(12.9)                                   | 14.67<br>(0.7)        | 16.7<br>(0.5)          |
| C3       | 153.1<br>(7.6)                                   | 467.1<br>(12.9)                                   | 10.9<br>(0.2)         | 14.4<br>(0.2)          |
| C4       | 126.0<br>(5.7)                                   | 361.9<br>(9.3)                                    | 14.2<br>(0.4)         | 23.8<br>(0.7)          |
| C5       | 141.1<br>(7.8)                                   | 454.2<br>(13.2)                                   | 12.9<br>(0.3)         | 16.9<br>(0.3)          |

Mean values of the total number of internal contacts formed in the  $\text{A}\beta_{1-42}$  ( $N_{\text{int}}^{\text{A}\beta}$ ) and  $\alpha\text{Syn}_{1-95}$  ( $N_{\text{int}}^{\alpha\text{S}}$ ) proteins in the five clusters. The corresponding radii of gyration (in Å) have been denoted as  $R_g^{\text{A}\beta}$  and  $R_g^{\alpha\text{S}}$ .

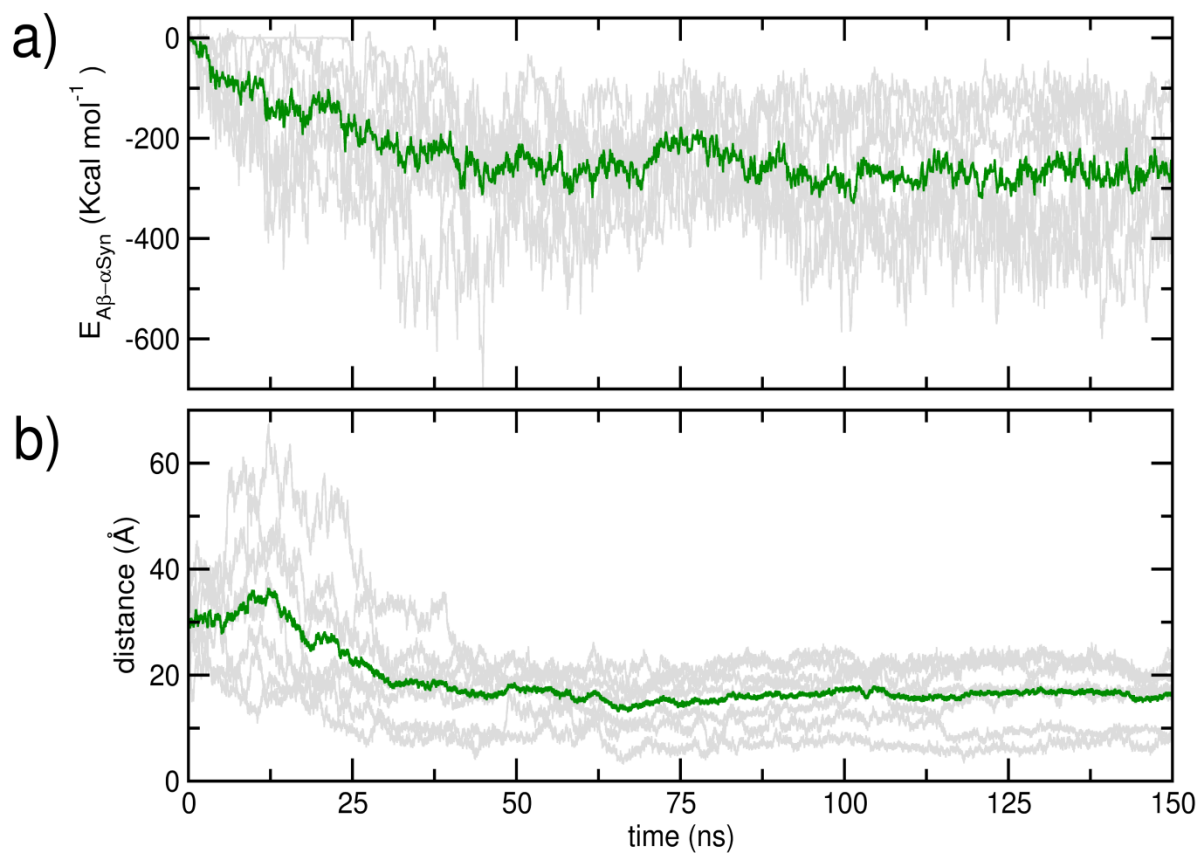

**Figure S1.** Evolution of the a) total inter-peptide interaction strength, and b) inter peptide distance over 150 ns for the dimerising trajectories.

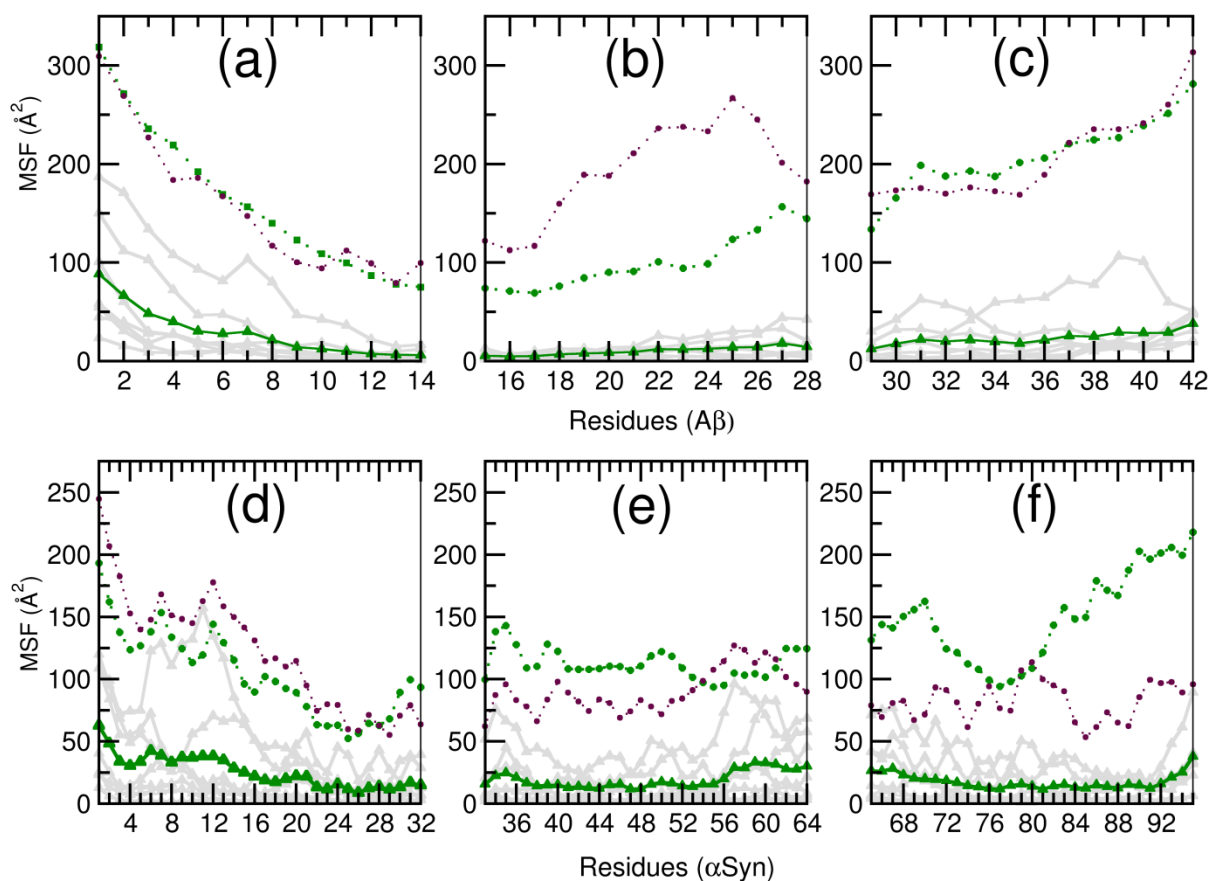

**Figure S2.** The backbone mean square fluctuation (MSF) for the a) N-terminal residues, b) middle regions, and c) C-terminal residues of  $A\beta_{1-42}$ , and the d) N-terminal residues, e) middle regions, and f) C-terminal residues of  $\alpha\text{Syn}_{1-95}$ . The data for the last 50 ns of the dimerising trajectories are shown in *gray*, with the averages in *green* (solid line). Corresponding average data for the same systems for the initial 50 ns is provided in *green* (broken line). Average data for the non-dimerising systems is shown in *maroon* (broken line) for comparison.

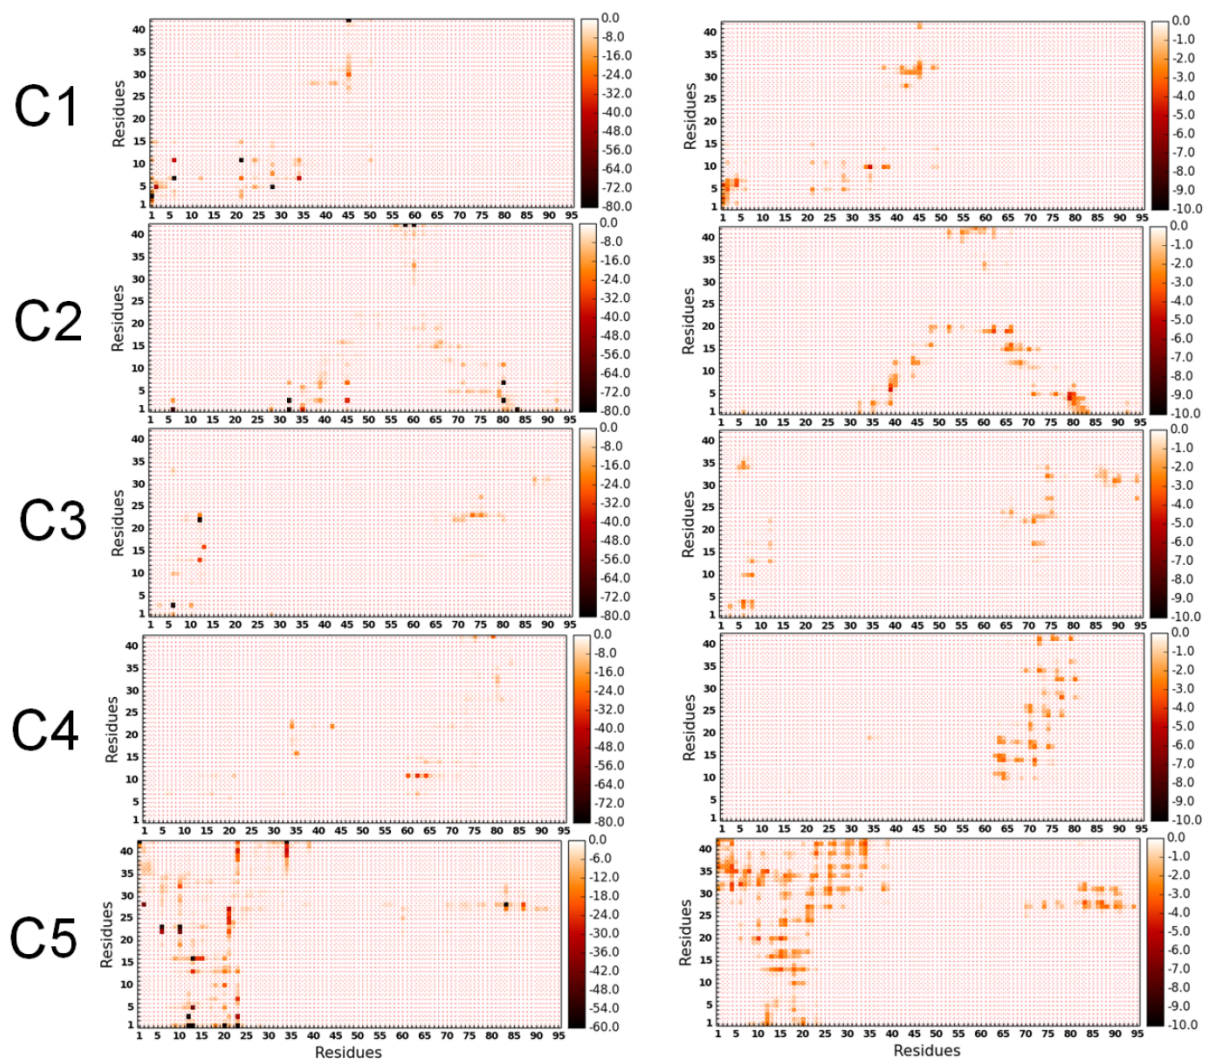

**Figure S3.** Residue wise maximum electrostatic (left column) and van der Waal (right column) interaction energies (in kcal mol<sup>-1</sup>) of  $\alpha$ Syn<sub>1-95</sub> with  $A\beta_{1-42}$  for clusters C1, C2, C3, C4 and C5.
